# Supplementary material for: Spt5 modulates cotranscriptional spliceosome assembly in Saccharomyces cerevisiae
Source: PubMed Central journal article supplement (PMC6800482; doi:10.1261/rna.070425.119), 2019-10

## Supplementary Figure S1 (related to Figure 3C)

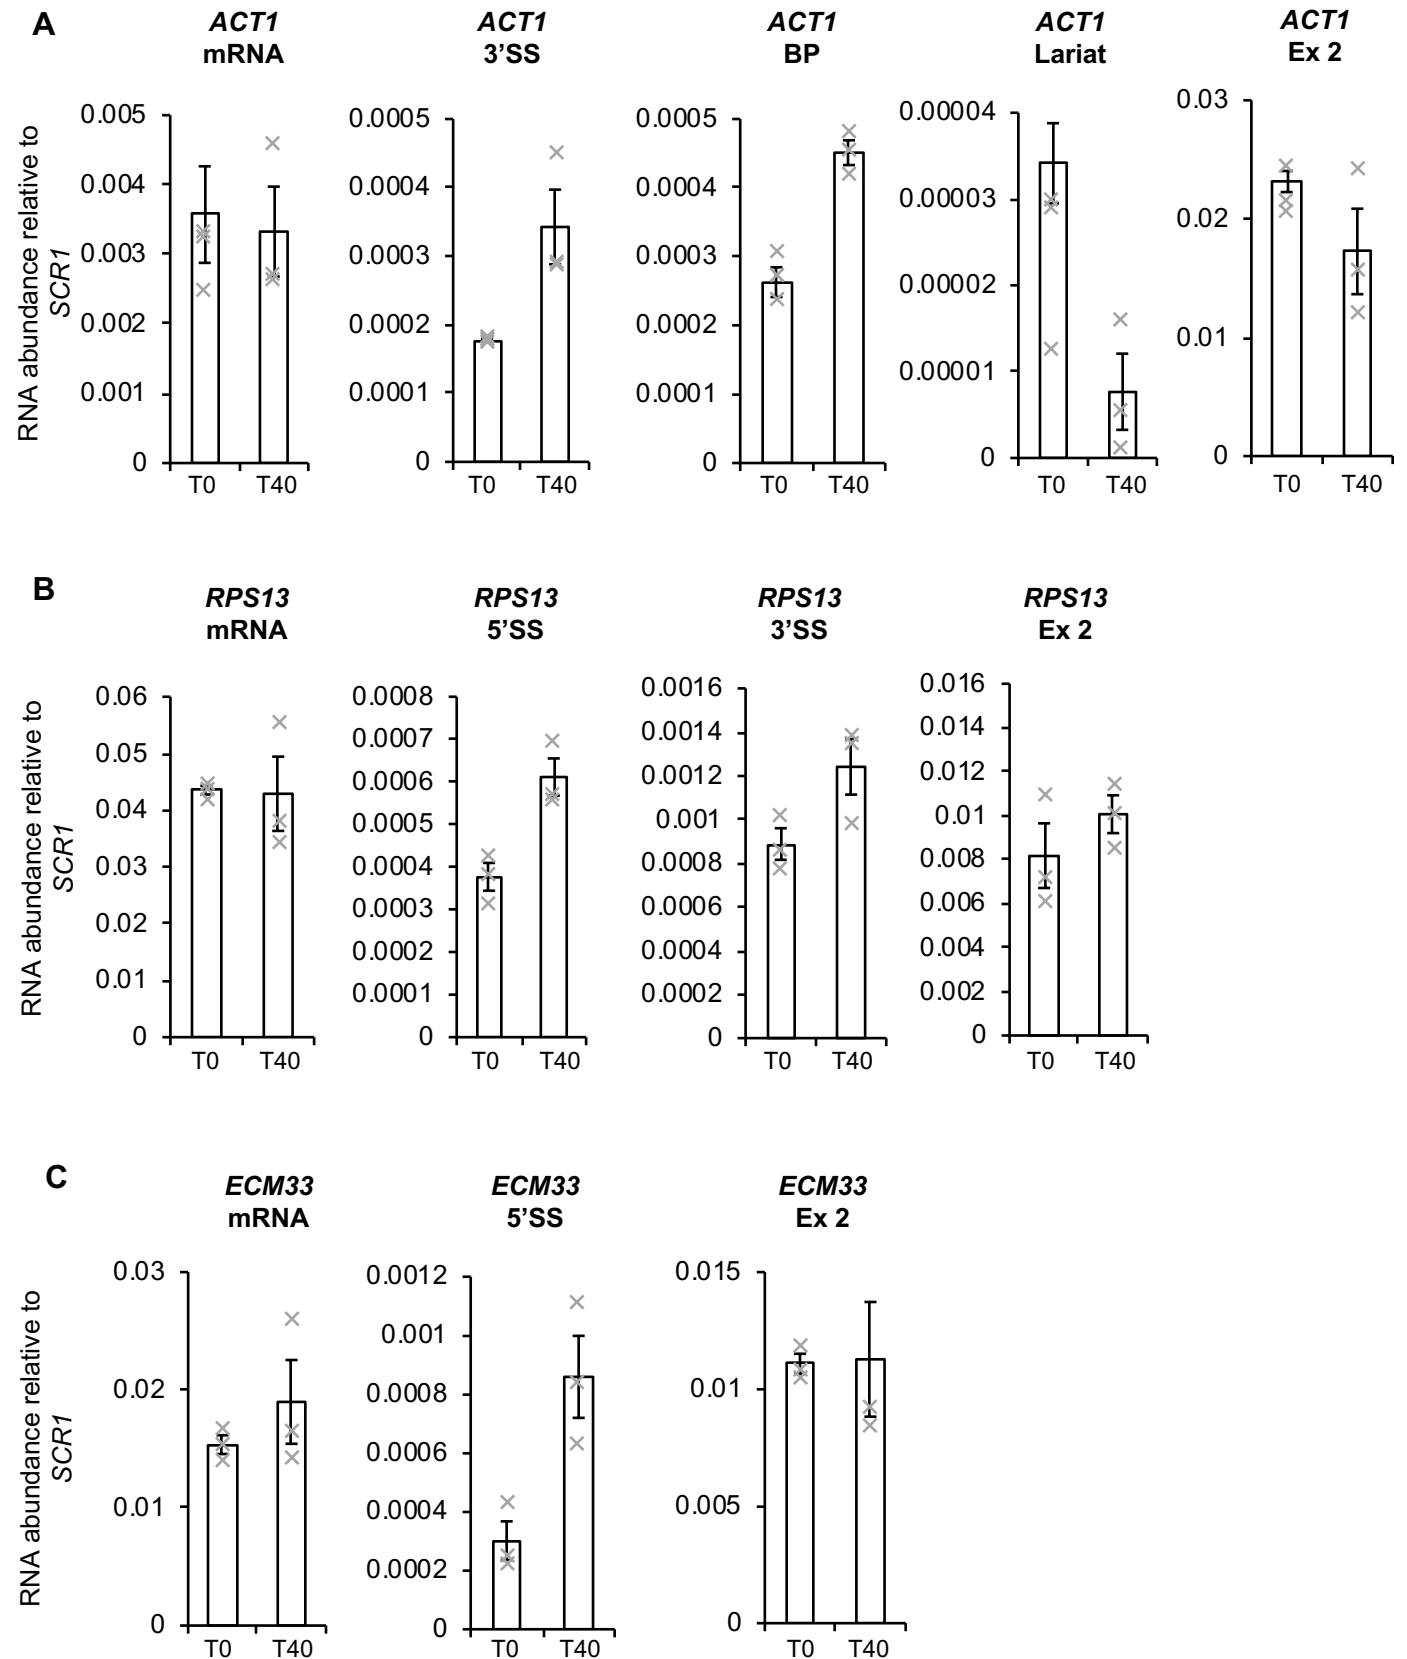

Supplement: supp_070425.119_Supplemental_Figure_S1.pdf [file supp_070425.119_Supplemental_Figure_S1.pdf]
